# Supplementary material for: Electrical-field-driven metal–insulator transition tuned with self-aligned atomic defects
Source: Royal Society of Chemistry journal article supplement (doi:10.1039/c5nr03251b), 2015-01-01
Supplement: c5nr03251b1.pdf [file c5nr03251b1.pdf]

## Supporting Information

# Electrical-field-driven metal-insulator transition tuned with self-aligned atomic defects

Askar Syrlybekov<sup>1,2,3</sup>, Han-Chun Wu<sup>1,\*</sup>, Ozhet Mauit<sup>2</sup>, Ye-Cun Wu<sup>1</sup>, Pierce Maguire<sup>2</sup>, Abbas Khalid<sup>2</sup>, Cormac Ó Coileáin<sup>1,2</sup>, Leo Farrell<sup>2</sup>, Cheng-Lin Heng<sup>1</sup>, Mohamed Abid<sup>4</sup>, Huajun Liu<sup>5</sup>, li Yang<sup>6</sup>, Hong-Zhou Zhang<sup>2</sup>, Igor V. Shvets<sup>2</sup>

<sup>1</sup>*School of Physics, Beijing Institute of Technology, Beijing 100081, People's Republic of China*

<sup>2</sup>*CRANN, School of Physics, Trinity College, University of Dublin, Dublin 2, Ireland*

<sup>3</sup>*Nazarbayev University, 53 Kabanbay Batyr Avenue, Astana 010000, Kazakhstan*

<sup>4</sup>*KSU-aramco Center, King Saud University, Riyadh 11451, Saudi Arabia*

<sup>5</sup>*Institute of Plasma Physics, Chinese Academy of Sciences, Hefei 230031, People's Republic of China*

<sup>6</sup>*Electronic Engineering Institute, Hefei, 230037, People's Republic of China*

\*Correspondence and requests for materials should be addressed to H.C.W. ([wuhc@bit.edu.cn](mailto:wuhc@bit.edu.cn))

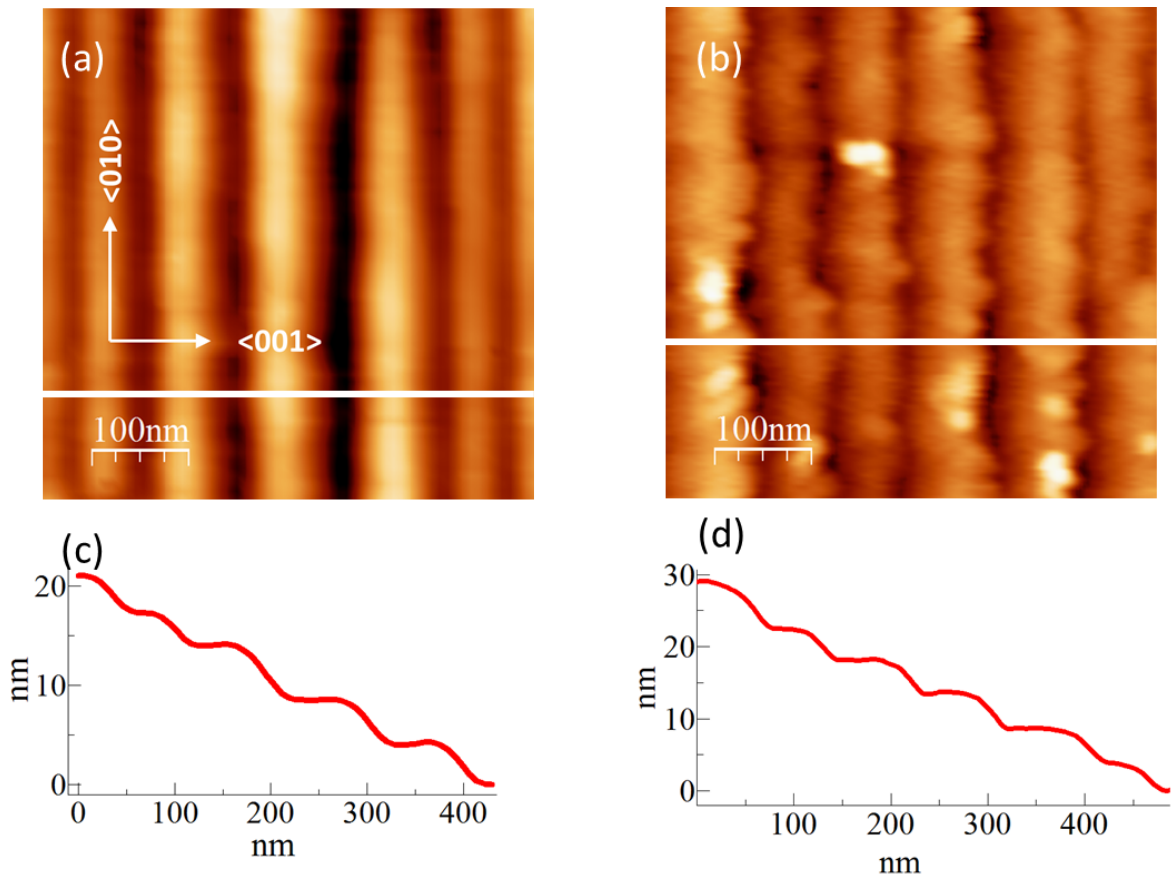

**Figure S1.** (a) AFM image of a SrTiO<sub>3</sub> substrate with a miscut angle of 3° annealed at 1130°C for 3 h (b) AFM image of 95 nm thick Fe<sub>3</sub>O<sub>4</sub> deposited on a stepped SrTiO<sub>3</sub> substrate. (c) and (d) are the corresponding height profile for SrTiO<sub>3</sub> substrate and for 95 nm thick Fe<sub>3</sub>O<sub>4</sub> deposited on a stepped SrTiO<sub>3</sub> substrate respectively.

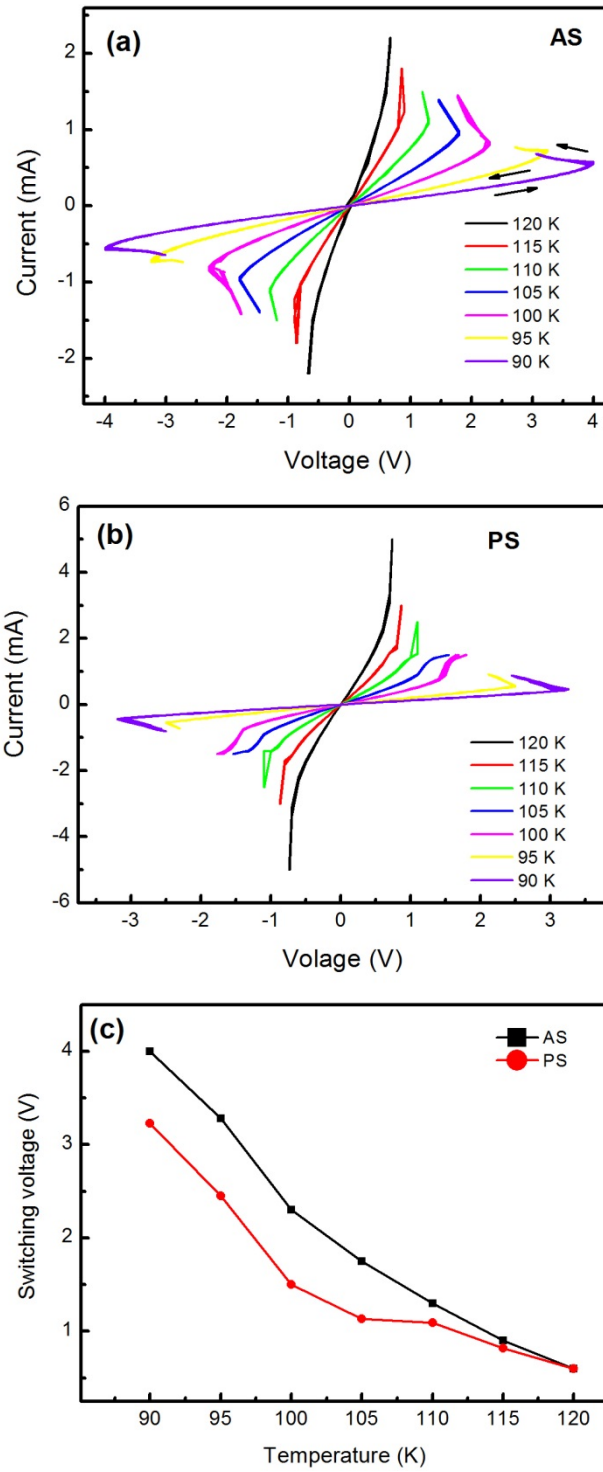

**Figure S2:** I-V measurements for another 100 nm thick  $\text{Fe}_3\text{O}_4$  film on a stepped  $\text{SrTiO}_3$  substrate with a temperature range between 120K – 90K, for devices with four probe electrodes in PS (a) and AS (b) configurations. (c) Difference in the switching on voltage for the electric field applied along the steps and perpendicular to steps.

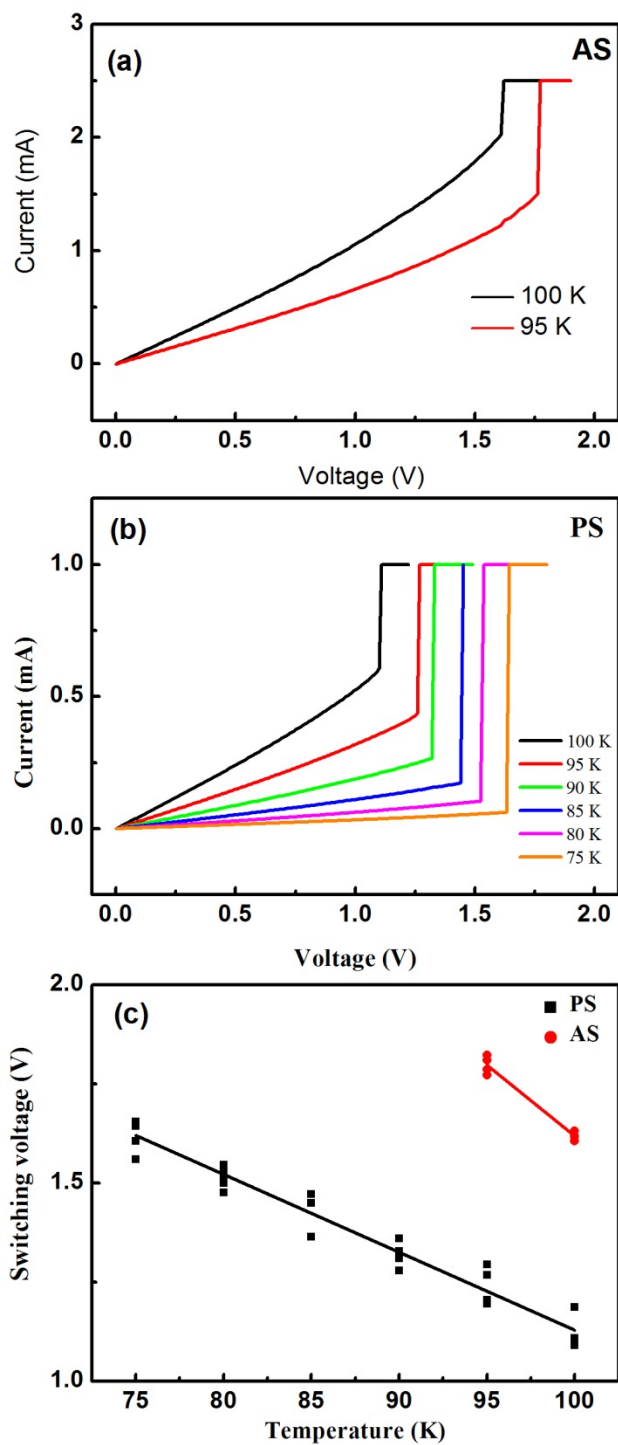

**Figure S3:** I-V measurements for a 60 nm thick  $\text{Fe}_3\text{O}_4$  film on a stepped MgO substrate with a temperature range between 120K – 90K, for devices with four probe electrodes in PS (a) and AS (b) configurations. (c) Difference in the switching on voltage for the electric field applied along the steps and perpendicular to steps.

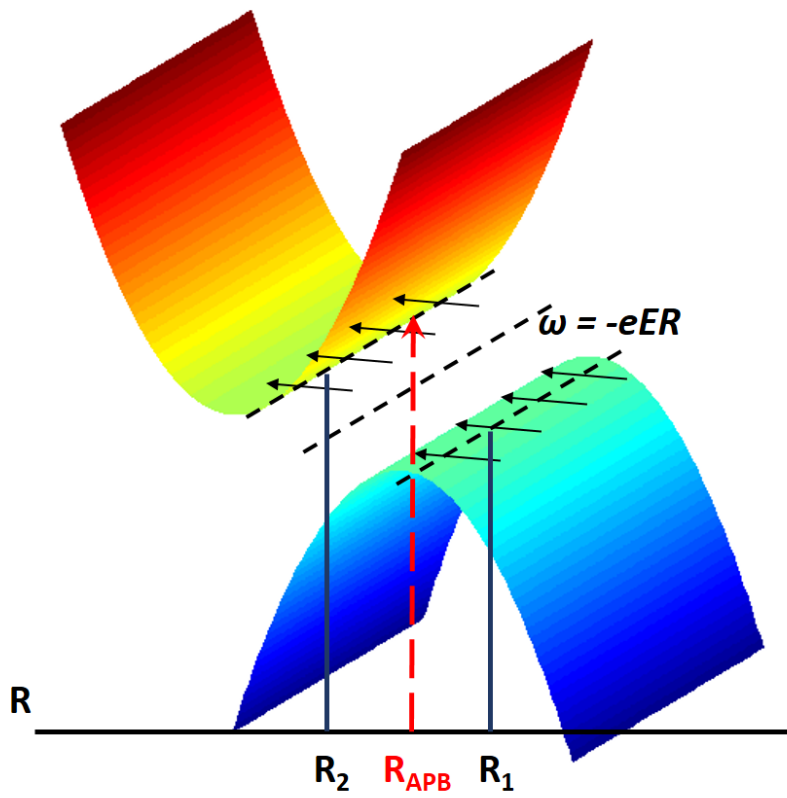

**Figure S4:** Schematic drawing of the band structure of Fe<sub>3</sub>O<sub>4</sub> with APBs under an electrical field of  $E$ .
